# Supplementary material
Source: PubMed Central journal article supplement (PMC3322496)
Supplement: epi0506_0516SD1.pdf [file epi0506_0516SD1.pdf]

**SUPPLEMENTARY FIGURE 1.** The genomic locations of the *DRD4*, *SERT* and *MAOA* DNA methylation assays utilized in this study (adapted from UCSC GRCH39 Genome Browser).

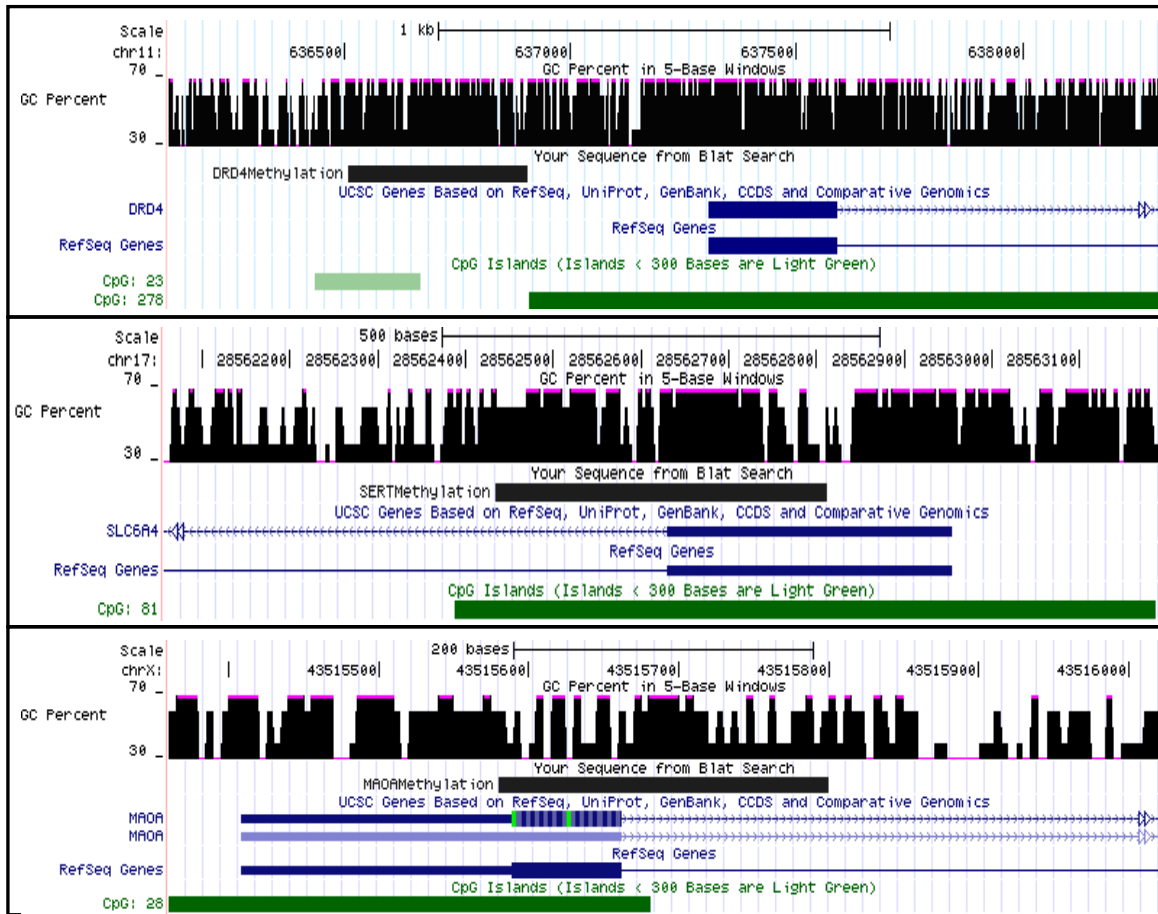

**SUPPLEMENTARY FIGURE 2.** Average DNA methylation level at specific CpG units for A) *DRD4*, B) *SERT*, C) *MAOA* male and D) *MAOA* female amplicons at age 5 and age 10. Error bars represent the standard deviation of the mean.

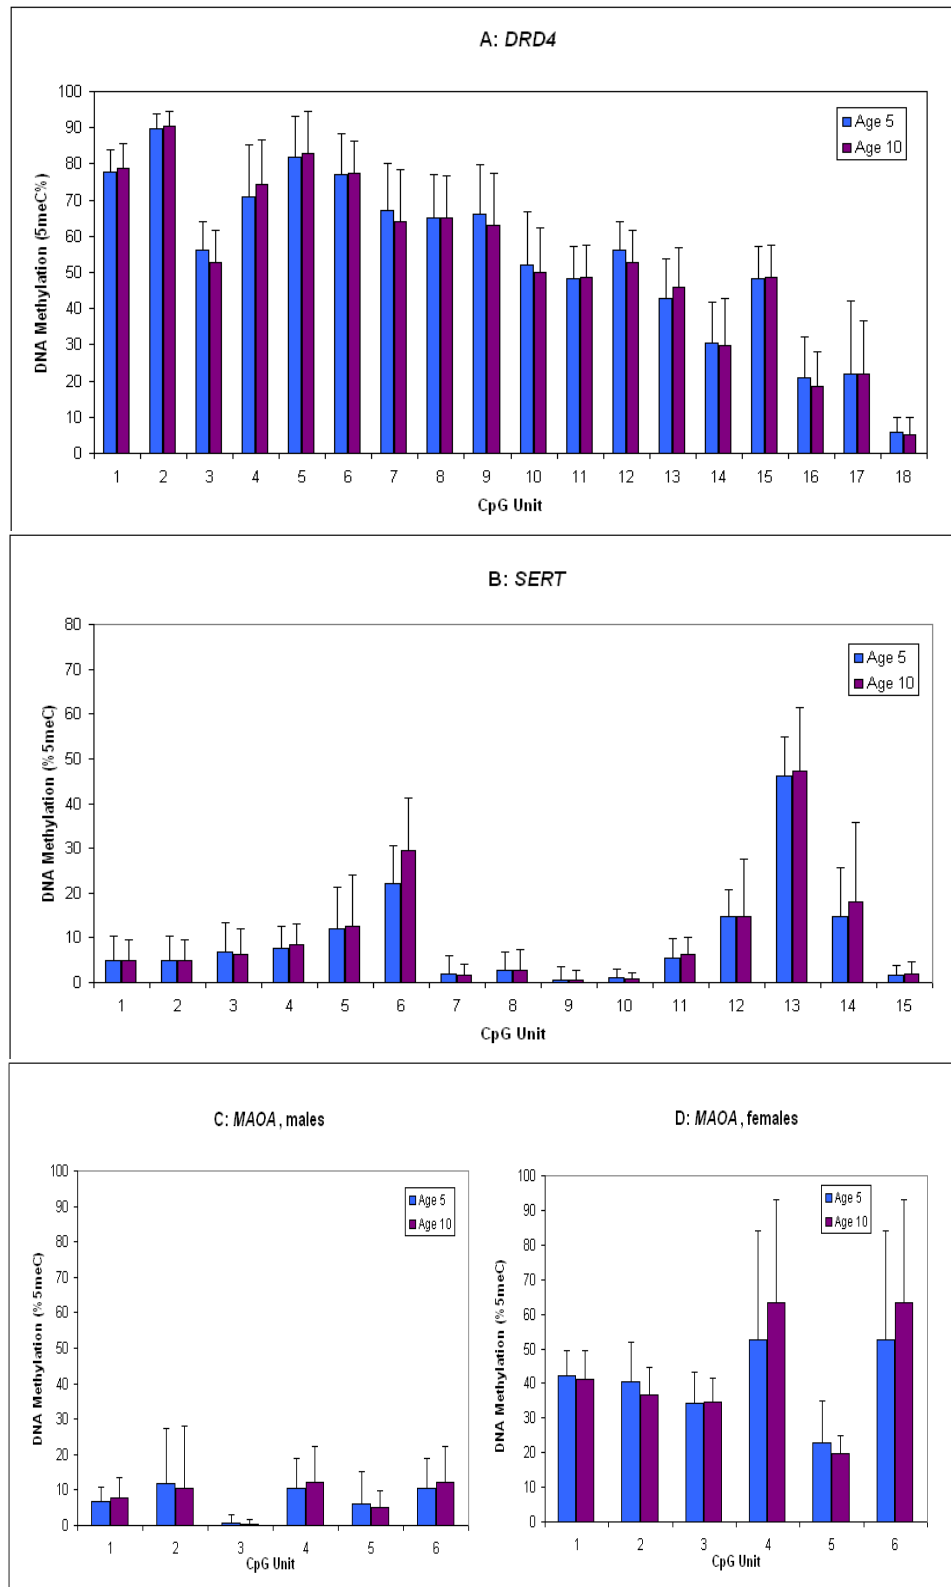

**SUPPLEMENTARY TABLE 1.** Summary of primer sequences for PCR amplification and the total number of twin-pairs included in the analyses for each gene. \*UCSC March GRCH39 Genomic Assembly. \*\*Primers were ordered with the standard Sequenom MassCLEAVE tails (F: aggaagagag, R:cagtaatcgcactactatagggagaaggct).

| Gene                                  | Genomic Region *        | Number of CpG units assessed | Primer Sequences** (5' to 3')                                     | Age 5  |    | Age 10 |    | Both |    |
|---------------------------------------|-------------------------|------------------------------|-------------------------------------------------------------------|--------|----|--------|----|------|----|
|                                       |                         |                              |                                                                   | MZ     | DZ | MZ     | DZ | MZ   | DZ |
| Dopamine D4 Receptor ( <i>DRD4</i> )  | chr11:636508-636904     | 18 CpG units (30 CpG sites)  | F: GGGATTTTTTGTAGGGTTAGAGG<br>R: CACCCTAATCCACCTAATATCTAACA       | 45     | 43 | 41     | 42 | 40   | 40 |
| Serotonin Transporter ( <i>SERT</i> ) | chr17:28562435-28562812 | 15 CpG units (27 CpG sites)  | F: GGTTAGTTTTAGTTTTGGTTTTTGTT<br>R: CAAAATTCTTCAAAAACCTTTAAC      | 44     | 44 | 43     | 39 | 41   | 38 |
| Monamine Oxidase A ( <i>MAOA</i> )    | chrX: 43515581-43515800 | 6 CpG units (7 CpG sites)    | F: GTTAAAGTATGGAGAATTAAGAGAAGG<br>R: CAAAATATAAAACCAAACCATAACTACA | Male   |    |        |    |      |    |
|                                       |                         |                              |                                                                   | 19     | 21 | 20     | 22 | 17   | 21 |
|                                       |                         |                              |                                                                   | Female |    |        |    |      |    |
|                                       |                         |                              |                                                                   | 22     | 21 | 21     | 20 | 20   | 19 |
